# Supplementary material for: Diversity and distribution of nitrogen fixation genes in the oxygen minimum zones of the world oceans
Source: Copernicus journal article supplement (doi:10.5194/bg-17-5953-2020), 2020-12-02
Supplement: Supplementary file 1 [file bg-17-5953-2020-supplement.zip]

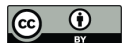

## *Supplement of*

# **Diversity and distribution of nitrogen fixation genes in the oxygen minimum zones of the world oceans**

**Amal Jayakumar and Bess B. Ward**

*Correspondence to:* Amal Jayakumar (ajayakum@princeton.edu)

- [bg-17-5953-2020-supplement-title-page.pdf](#)
- [SupplementalTableS1.xlsx](#)
- [SupplementalTableS2.xlsx](#)

The copyright of individual parts of the supplement might differ from the CC BY 4.0 License.
